# Supplementary material for: Rapid Fabrication by Digital Light Processing 3D Printing of a SlipChip with Movable Ports for Local Delivery to Ex Vivo Organ Cultures
Source: MDPI journal article supplement (doi:10.3390/mi12080993), 2021-08-20
Supplement: s1 [file s1]

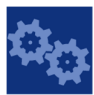

# Supplementary Materials: Rapid Fabrication by Digital Light Processing 3D Printing of a SlipChip with Movable Ports For Local Delivery to Ex Vivo Organ Cultures

Megan A Catterton <sup>1</sup>, Alexander G Ball <sup>2</sup> and Rebecca R Pompano <sup>1,3,4,\*</sup>

<sup>1</sup> Department of Chemistry, University of Virginia College of Arts and Science, Charlottesville, VA 22904, USA; mac6fa@virginia.edu

<sup>2</sup> Department of Microbiology, Immunology and Cancer Biology, University of Virginia School of Medicine, Charlottesville, VA, 22903, USA; agb2kp@virginia.edu

<sup>3</sup> Carter Immunology Center and UVA Cancer Center, University of Virginia, Charlottesville, VA 22903, USA

<sup>4</sup> Department of Biomedical Engineering, University of Virginia School of Engineering and Applied Sciences, Charlottesville, VA 22904-4259, VA, USA

\* Correspondence: rrp2z@virginia.edu

## 1. Supporting Methods

### 1.1. RfOEG synthesis

Triethyleneglycol mono[1H,1H-perfluorooctyl]ether, RfOEG, was synthesized using published protocols [1,2]. RfOEG was stored at a stock concentration of 20 mg/mL in FC-40 (Sigma Aldrich, St. Louis MO, USA) at -20 °C. For experiments, RfOEG was diluted to a working concentration of 0.5 mg/mL in FC-40.

## 2. Supporting Figures

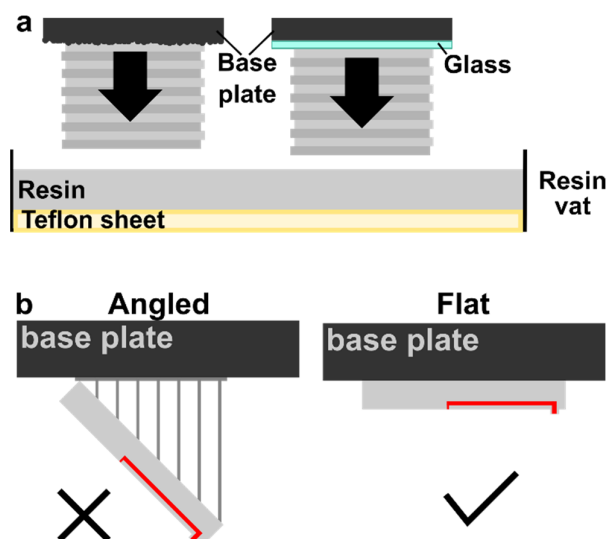

**Figure S1.** Orientation of cubes during printing affects the roughness of the faces of the cube. (a) Cubes printed against an aluminum-based plate (left) or a piece of glass (right). Arrow points towards the top of the cube, which would be the face printed against PTFE sheet. (b) Schematic of the printing orientation needed to achieve a smooth surface on the top of the delivery component. The red line represents the enclosed channel. .

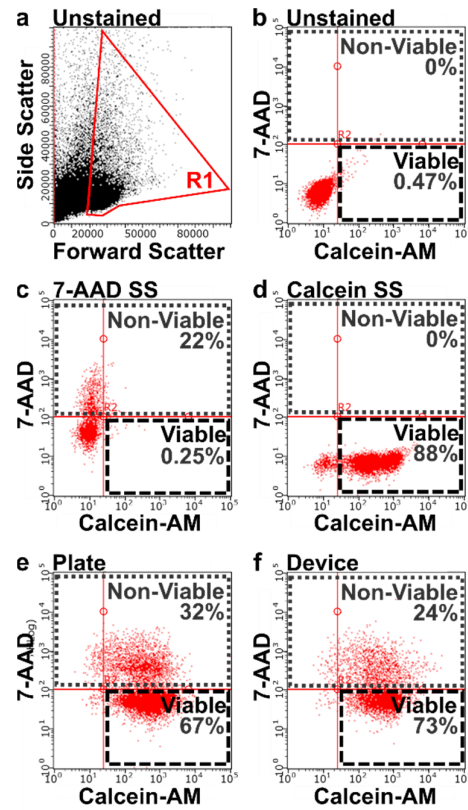

**Figure S2.** Gating strategy for analysis of cell viability by flow cytometry. (a) Cells obtained from crushed tissue slices were gated on scatter and singlets and (b–f) analyzed for intensity of.

Calcein-AM and 7-AAD. The unstained (b) and single stains (SS) for each dye (c, 7-AAD and d, Calcein-AM) were used to set the position of the quadrants. Any cell high in 7-AAD was considered non-viable and cells high in Calcein-AM and low in 7-AAD fluorescence were considered viable. Examples of a plate cultured control slice (e) and a slice that was exposed to BV-007A (f) are shown.

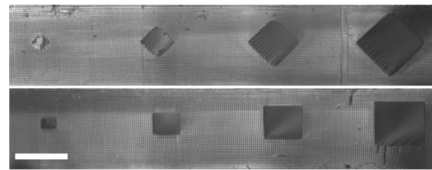

**Figure S3.** Micrograph showing the internal cross-sections of 3D channels, from the experiment in Figure 3d. Scale bar is 1 mm.

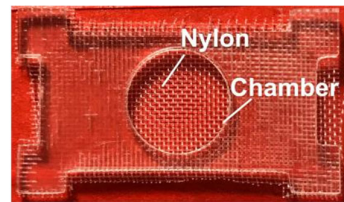

**Figure S4.** Photo showing mesh incorporated into bottom of the chamber component. For scale, the chamber shown was 12 mm in diameter.

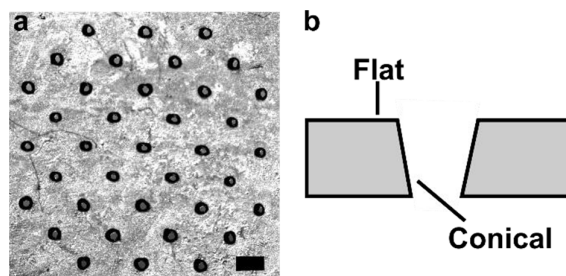

**Figure S5.** Port shapes after laser etching of parts 3D printed in BV-007A resin. **(a)** An enlarged version of the inset in figure 3 of the laser etch port array. The scale bar is 0.5 mm. **(b)** Schematic of the side view of the created ports. A flat profile was observed above and below the port.

## Reference

1. Roach, L.S.; Song, H.; Ismagilov, R.F. Controlling Nonspecific Protein Adsorption in a Plug-Based Microfluidic System by Controlling Interfacial Chemistry Using FluorousPhase Surfactants. *Anal. Chem.* **2005**, *77*, 785–796, doi:10.1021/ac049061w.
2. Cristini, V.; Tan, Y.-C. Theory and Numerical Simulation of Droplet Dynamics in Complex Flows—a Review. *Lab Chip* **2004**, *4*, 257–264, doi:10.1039/B403226H.
